# Supplementary material for: Types of Anxiety and Depression: Theoretical Assumptions and Development of the Anxiety and Depression Questionnaire
Source: PubMed Central journal article supplement (PMC5787098; doi:10.3389/fpsyg.2017.02376), 2018-01-23
Supplement: DataSheet1.pdf [file DataSheet1.pdf]

# Anxiety and Depression Questionnaire (ADQ-AD)

Małgorzata Fajkowska, Agata Wytykowska, Joanna Kantor-Martynuska  
& Ewa Domaradzka

|                                     |
|-------------------------------------|
| Name and surname/ or nickname ..... |
| Date of birth .....Sex .....        |
| Education .....E-mail address.....  |

This questionnaire contains statements that concern various emotions, experiences, and behaviors. Each statement can be responded to by circling "Agree" or "Disagree". Please mark the answer that describes you better. Do not spend too much time on individual statements. There are no good or bad responses. Please respond to all of the statements provided below.

|                                                                                                     |                 |
|-----------------------------------------------------------------------------------------------------|-----------------|
| 1. I am usually in a good mood.                                                                     | Agree/ Disagree |
| 2. I feel completely bored.                                                                         | Agree/ Disagree |
| 3. It usually takes some time for me to realize that something nice is happening around me.         | Agree/ Disagree |
| 4. I often feel sad.                                                                                | Agree/ Disagree |
| 5. I feel confident.                                                                                | Agree/ Disagree |
| 6. I feel lively and full of energy.                                                                | Agree/ Disagree |
| 7. I have lost all interest in sex.                                                                 | Agree/ Disagree |
| 8. When someone tells a story that is full of various emotions, I feel that my thoughts drift away. | Agree/ Disagree |
| 9. I am disappointed with myself.                                                                   | Agree/ Disagree |
| 10. I do not feel lonely.                                                                           | Agree/ Disagree |
| 11. I cannot enjoy it when someone praises or expresses appreciation of me.                         | Agree/ Disagree |

|                                                                                                 |                 |
|-------------------------------------------------------------------------------------------------|-----------------|
| 12. I feel slowed.                                                                              | Agree/ Disagree |
| 13. I feel enveloped by a dark despair.                                                         | Agree/ Disagree |
| 14. I approach life with hope.                                                                  | Agree/ Disagree |
| 15. I feel like I do not see the positive side of many situations.                              | Agree/ Disagree |
| 16. Even if I manage to achieve a goal, I cannot enjoy it.                                      | Agree/ Disagree |
| 17. I feel worthless.                                                                           | Agree/ Disagree |
| 18. I often smile honestly and joke.                                                            | Agree/ Disagree |
| 19. I cannot mobilize myself to do anything.                                                    | Agree/ Disagree |
| 20. I feel very insecure.                                                                       | Agree/ Disagree |
| 21. I feel that people and the world inspire me.                                                | Agree/ Disagree |
| 22. It takes some time to me before I realize that something unpleasant is happening around me. | Agree/ Disagree |
| 23. I feel full of energy.                                                                      | Agree/ Disagree |
| 24. I find it difficult to have fun and laugh with others.                                      | Agree/ Disagree |
| 25. I feel depressed and I cannot escape it.                                                    | Agree/ Disagree |
| 26. I often feel joy.                                                                           | Agree/ Disagree |
| 27. I find it difficult to finish things that I have started.                                   | Agree/ Disagree |
| 28. I feel good with myself.                                                                    | Agree/ Disagree |
| 29. I cannot engage in films/novels that cause strong emotions in others.                       | Agree/ Disagree |
| 30. I am often so unhappy that it is unbearable.                                                | Agree/ Disagree |
| 31. I can start new things without difficulty.                                                  | Agree/ Disagree |
| 32. I feel fulfilled.                                                                           | Agree/ Disagree |
| 33. Emotional events distract me so much that I later have trouble concentrating.               | Agree/ Disagree |

---

|                                                                                                                          |                 |
|--------------------------------------------------------------------------------------------------------------------------|-----------------|
| 34. I am rarely happy when I get a gift.                                                                                 | Agree/ Disagree |
| 35. I have plans that I realize willingly.                                                                               | Agree/ Disagree |
| 36. I feel emotionally spent.                                                                                            | Agree/ Disagree |
| 37. I find happiness in small things.                                                                                    | Agree/ Disagree |
| 38. Everything I do makes me tired.                                                                                      | Agree/ Disagree |
| 39. I am afraid of many things.                                                                                          | Agree/ Disagree |
| 40. I am often cheerful.                                                                                                 | Agree/ Disagree |
| 41. I feel like I do not have anything interesting and enjoyable to do.                                                  | Agree/ Disagree |
| 42. I have no appetite.                                                                                                  | Agree/ Disagree |
| 43. I enjoy every day.                                                                                                   | Agree/ Disagree |
| 44. I often feel guilty for various reasons.                                                                             | Agree/ Disagree |
| 45. I am full of positive emotions.                                                                                      | Agree/ Disagree |
| 46. I have great difficulty making decisions.                                                                            | Agree/ Disagree |
| 47. I have thought about suicide.                                                                                        | Agree/ Disagree |
| 48. I feel like I notice nice things in my surroundings more slowly than others, e.g., good weather or beautiful sights. | Agree/ Disagree |
| 49. I feel lonely and abandoned.                                                                                         | Agree/ Disagree |
| 50. I have many reasons to be happy.                                                                                     | Agree/ Disagree |
| 51. I feel like I deserve punishment.                                                                                    | Agree/ Disagree |
| 52. I feel like the future is hopeless and nothing can change that.                                                      | Agree/ Disagree |
| 53. Many things make me happy.                                                                                           | Agree/ Disagree |
| 54. I do not see any sense in what I do.                                                                                 | Agree/ Disagree |

---

|     |                                                                                                                       |                 |
|-----|-----------------------------------------------------------------------------------------------------------------------|-----------------|
| 55. | I feel like I notice ugly things in my surroundings more slowly than others, e.g., cloudy weather or a littered area. | Agree/ Disagree |
| 56. | I feel resentful for many reasons.                                                                                    | Agree/ Disagree |
| 57. | I do not feel like doing anything.                                                                                    | Agree/ Disagree |
| 58. | Contact with people tires me.                                                                                         | Agree/ Disagree |
| 59. | It is easy to make me happy.                                                                                          | Agree/ Disagree |
| 60. | I wish it would all end.                                                                                              | Agree/ Disagree |
| 61. | I can laugh and see the funny side of things.                                                                         | Agree/ Disagree |
| 62. | Everything seems bland and trivial.                                                                                   | Agree/ Disagree |
| 63. | I am not able to feel happy with things that happen to me.                                                            | Agree/ Disagree |
| 64. | I have a zeal for acting.                                                                                             | Agree/ Disagree |

---

Please make sure you did not omit any of the above statements.
