# Supplementary material for: Types of Anxiety and Depression: Theoretical Assumptions and Development of the Anxiety and Depression Questionnaire
Source: PubMed Central journal article supplement (PMC5787098; doi:10.3389/fpsyg.2017.02376), 2018-01-23
Supplement: DataSheet2.pdf [file DataSheet2.pdf]

# Anxiety and Depression Questionnaire (ADQ-VD)

Małgorzata Fajkowska, Agata Wytykowska, Joanna Kantor-Martynuska  
& Ewa Domaradzka

Name and surname/ or nickname .....

Date of birth .....Sex .....

Education .....E-mail address.....

This questionnaire contains statements that concern various emotions, experiences, and behaviors. Each statement can be responded to by circling "Agree" or "Disagree". Please mark the answer that describes you better. Do not spend too much time on individual statements. There are no good or bad responses. Please respond to all of the statements provided below.

|     |                                                                                                                 |                 |
|-----|-----------------------------------------------------------------------------------------------------------------|-----------------|
| 1.  | I prefer to travel by car rather than by train.                                                                 | Agree/ Disagree |
| 2.  | My impression is that it is sometimes difficult for me to recognize negative emotions in others.                | Agree/ Disagree |
| 3.  | I am very often tense.                                                                                          | Agree/ Disagree |
| 4.  | I often have headaches after social events.                                                                     | Agree/ Disagree |
| 5.  | It is difficult for me to get involved in news and stories that other people find moving.                       | Agree/ Disagree |
| 6.  | I am very often edgy.                                                                                           | Agree/ Disagree |
| 7.  | I often feel hurt by what someone says.                                                                         | Agree/ Disagree |
| 8.  | In comparison to others, it is more difficult for me to notice the various nuances in relations between people. | Agree/ Disagree |
| 9.  | I often feel overwhelmed by sadness.                                                                            | Agree/ Disagree |
| 10. | I have the impression that it is sometimes difficult for me to recognize my own negative emotions.              | Agree/ Disagree |
| 11. | People often say that I am malicious.                                                                           | Agree/ Disagree |
| 12. | I feel that I am in a bad mood right now.                                                                       | Agree/ Disagree |

|     |                                                                                                  |                 |
|-----|--------------------------------------------------------------------------------------------------|-----------------|
| 13. | I like to cook.                                                                                  | Agree/ Disagree |
| 14. | When I am among people, I feel like I am “behind the glass”.                                     | Agree/ Disagree |
| 15. | Usually when I am talking about something, it lacks emotion.                                     | Agree/ Disagree |
| 16. | I often get angry.                                                                               | Agree/ Disagree |
| 17. | Sometimes I have trouble telling whether someone has positive or negative attitude towards me.   | Agree/ Disagree |
| 18. | I feel that I am afraid of something for no apparent reason.                                     | Agree/ Disagree |
| 19. | It takes some time for me until I realize that a given situation is nice and pleasant.           | Agree/ Disagree |
| 20. | Social events tire me.                                                                           | Agree/ Disagree |
| 21. | I am often anxious and worried.                                                                  | Agree/ Disagree |
| 22. | I find it difficult to notice that someone is sad.                                               | Agree/ Disagree |
| 23. | I feel a lot of impatience with people.                                                          | Agree/ Disagree |
| 24. | I often find out that I did not notice something important about the behavior of another person. | Agree/ Disagree |
| 25. | I feel that it is very easy to hurt me.                                                          | Agree/ Disagree |
| 26. | I find it difficult to notice that someone is happy.                                             | Agree/ Disagree |
| 27. | In my relations with people I often feel humiliated.                                             | Agree/ Disagree |
| 28. | Sometimes I have no idea what I am feeling in a given moment.                                    | Agree/ Disagree |
| 29. | I find my relations with others to be “emotionally bland”.                                       | Agree/ Disagree |
| 30. | It is difficult for me to notice anger in others.                                                | Agree/ Disagree |
| 31. | I do not feel comfortable during social situations, that is why I avoid them.                    | Agree/ Disagree |
| 32. | I like animals.                                                                                  | Agree/ Disagree |
| 33. | I think that people deliberately do things to me out of spite.                                   | Agree/ Disagree |
| 34. | I often fail to notice that I have hurt someone.                                                 | Agree/ Disagree |

|     |                                                                                                   |                 |
|-----|---------------------------------------------------------------------------------------------------|-----------------|
| 35. | I am often restless.                                                                              | Agree/ Disagree |
| 36. | During an argument or conflict, it is difficult for me to recognize what the other side feels.    | Agree/ Disagree |
| 37. | I have a favorite film.                                                                           | Agree/ Disagree |
| 38. | I tend to react with anger towards other people's behaviors.                                      | Agree/ Disagree |
| 39. | I try to avoid group activities.                                                                  | Agree/ Disagree |
| 40. | When I am watching a film, I cannot distinguish what emotions the main character is experiencing. | Agree/ Disagree |

Please make sure you did not omit any of the above statements.
