# Supplementary material for: Types of Anxiety and Depression: Theoretical Assumptions and Development of the Anxiety and Depression Questionnaire
Source: PubMed Central journal article supplement (PMC5787098; doi:10.3389/fpsyg.2017.02376), 2018-01-23
Supplement: DataSheet3.pdf [file DataSheet3.pdf]

# Anxiety and Depression Questionnaire (ADQ-ArA)

Małgorzata Fajkowska, Agata Wytykowska, Joanna Kantor-Martynuska  
& Ewa Domaradzka

Name and surname/ or nickname .....

Date of birth .....Sex .....

Education .....E-mail address.....

This questionnaire contains statements that concern various emotions, experiences, and behaviors. Each statement can be responded to by circling "Agree" or "Disagree". Please mark the answer that describes you better. Do not spend too much time on individual statements. There are no good or bad responses. Please respond to all of the statements provided below.

- |                                                                          |                 |
|--------------------------------------------------------------------------|-----------------|
| 1. I am rarely tense.                                                    | Agree/ Disagree |
| 2. I do not panic, even in the face of threats and dangers.              | Agree/ Disagree |
| 3. Whenever something scares me, I feel a sudden attack of heat or cold. | Agree/ Disagree |
| 4. I enjoy reading books.                                                | Agree/ Disagree |
| 5. I am afraid of new situations more than other people.                 | Agree/ Disagree |
| 6. I often get sudden anxiety attacks.                                   | Agree/ Disagree |
| 7. When I get stressed, I can feel my eyes tear up.                      | Agree/ Disagree |
| 8. When I am tense, I do not see what is happening around me.            | Agree/ Disagree |
| 9. I instinctively avoid contact with new people.                        | Agree/ Disagree |
| 10. My skin crawls when I hear news about something upsetting.           | Agree/ Disagree |
| 11. I stay calm in difficult situations.                                 | Agree/ Disagree |

|                                                                                                        |                 |
|--------------------------------------------------------------------------------------------------------|-----------------|
| 12. I sometimes panic.                                                                                 | Agree/ Disagree |
| 13. I easily focus on negative things.                                                                 | Agree/ Disagree |
| 14. When I am scared, I feel tingling and numbness in my body.                                         | Agree/ Disagree |
| 15. Contact with new people usually makes me uneasy.                                                   | Agree/ Disagree |
| 16. I get anxiety attacks for no reason.                                                               | Agree/ Disagree |
| 17. I have favorite foods.                                                                             | Agree/ Disagree |
| 18. When something unexpected scares me, I feel like my legs collapse underneath me.                   | Agree/ Disagree |
| 19. When I am afraid of something, it is usually difficult for me to breathe deeply.                   | Agree/ Disagree |
| 20. I am terribly afraid of heights.                                                                   | Agree/ Disagree |
| 21. I prefer the sea to the mountains.                                                                 | Agree/ Disagree |
| 22. When I am scared, I feel pain in my chest.                                                         | Agree/ Disagree |
| 23. When I get stressed, I cannot swallow anything.                                                    | Agree/ Disagree |
| 24. When someone unexpectedly asks me something, I do not know what to say, even if I know the answer. | Agree/ Disagree |
| 25. Things that I am afraid of immediately draw my attention.                                          | Agree/ Disagree |
| 26. It is difficult to scare me.                                                                       | Agree/ Disagree |
| 27. When I am afraid of something, I feel dizzy.                                                       | Agree/ Disagree |
| 28. When I am stressed, I feel like I am choking.                                                      | Agree/ Disagree |
| 29. I do not get anxiety or panic attacks.                                                             | Agree/ Disagree |
| 30. When I notice a potential threat, I automatically withdraw from the given situation.               | Agree/ Disagree |
| 31. My hands and legs shake from fear.                                                                 | Agree/ Disagree |
| 32. When I fear something, I often feel paralyzed.                                                     | Agree/ Disagree |
| 33. When I am afraid, I feel like I am about to die.                                                   | Agree/ Disagree |

---

|                                                                                         |                 |
|-----------------------------------------------------------------------------------------|-----------------|
| 34. I like learning foreign languages.                                                  | Agree/ Disagree |
| 35. When somebody says something to me unexpectedly, I usually shudder.                 | Agree/ Disagree |
| 36. When I get scared, I become drenched in sweat.                                      | Agree/ Disagree |
| 37. When I know that others are watching, doing things is difficult for me.             | Agree/ Disagree |
| 38. When I am tense, I often do not notice signs of danger.                             | Agree/ Disagree |
| 39. When I accidentally meet someone that I am afraid of, I feel like my legs give out. | Agree/ Disagree |
| 40. Anxiety keeps me from speaking without preparation.                                 | Agree/ Disagree |
| 41. Stress makes my stomach turn.                                                       | Agree/ Disagree |
| 42. I jitter when I am stressed by something.                                           | Agree/ Disagree |
| 43. My voice trembles when I am stressed.                                               | Agree/ Disagree |
| 44. I often panic.                                                                      | Agree/ Disagree |
| 45. When something unsettling is going on, I can immediately feel it in my body.        | Agree/ Disagree |

---

Please make sure you did not omit any of the above statements.
